# Supplementary material for: Intensity and Duration of Negative Emotions: Comparing the Role of Appraisals and Regulation Strategies
Source: PLoS One. 2014 Mar 26;9(3):e92410. doi: 10.1371/journal.pone.0092410 (PMC3966809; doi:10.1371/journal.pone.0092410)
Supplement: File S1 — This file contains the Tables S1–S6 in which the correlations between appraisals and emotion-regulation strategies are displayed for each emotion separately. (DOCX) [file pone.0092410.s001.docx]

Table S1. Correlations between Appraisals and Emotion-regulation Strategies for Episodes of Anger.

|  | Rumination | Reflection | Reappraisal | Suppression | Distraction |
| --- | --- | --- | --- | --- | --- |
| Importance | .50** | .35** | .20** | .18** | .26** |
| Disadvantageousness | .31** | .27** | .19** | .24** | .18** |
| Other responsibility | -.01 | .05 | .04 | -.06 | -.03 |
| Own responsibility | .16** | .14** | .21** | .15** | .12* |
| Problem-focused coping | .00 | .00 | .08 | .04 | .05 |
| Emotion-focused coping | -.36** | -.22** | -.12* | -.10* | -.21** |
| Expectedness | -.05 | -.02 | .06 | -.02 | .03 |
| Injustice | .26** | .17** | .13* | .03 | .06 |
| Self-image | .53** | .41** | .35** | .32** | .35** |
| Immorality | .29** | .20** | .17** | .17** | .19** |
| ** *p* < 0.01 * *p* < 0.05 | | | | | |

**Table S2. Correlations between Appraisals and Emotion-regulation Strategies for Episodes of Disgust.**

|  | Rumination | Reflection | Reappraisal | Suppression | Distraction |
| --- | --- | --- | --- | --- | --- |
| Importance | .65** | .53** | .35** | .27** | .17** |
| Disadvantageousness | .39** | .28** | .19** | .22** | .28** |
| Other responsibility | .08 | .13** | .01 | .01 | .17** |
| Own responsibility | .11* | .06 | .15** | .11* | -.01 |
| Problem-focused coping | .10* | .13* | .05 | .06 | -.03 |
| Emotion-focused coping | -.44** | -.30** | -.27** | -.21** | -.20** |
| Expectedness | -.10 | .03 | .04 | .07 | .00 |
| Injustice | .50** | .42** | .23** | .08 | .09 |
| Self-image | .62** | .52** | .40** | .36** | .25** |
| Immorality | .45** | .38** | .21** | .10* | .08 |
| ** *p* < 0.01 * *p* < 0.05 | | | | | |

**Table S3. Correlations between Appraisals and Emotion-regulation Strategies for Episodes of Fear.**

|  | Rumination | Reflection | Reappraisal | Suppression | Distraction |
| --- | --- | --- | --- | --- | --- |
| Importance | .54** | .38** | .22** | .10* | .16** |
| Disadvantageousness | .38** | .26** | .11* | .14** | .15** |
| Other responsibility | .12* | .12* | -.04 | -.06 | -.02 |
| Own responsibility | .13* | .15** | .19** | .21** | .09 |
| Problem-focused coping | .08 | .09 | .11* | .14** | .06 |
| Emotion-focused coping | -.28** | -.13** | -.11* | -.10 | -.16** |
| Expectedness | -.08 | -.03 | .09 | .22** | .19** |
| Injustice | .36** | .30** | .17** | .10 | .18** |
| Self-image | .44** | .37** | .28** | .22** | .17** |
| Immorality | .33** | .31** | .17** | .14** | .18** |
| ** *p* < 0.01 * *p* < 0.05 | | | | | |

**Table S4. Correlations between Appraisals and Emotion-regulation Strategies for Episodes of Guilt.**

|  | Rumination | Reflection | Reappraisal | Suppression | Distraction |
| --- | --- | --- | --- | --- | --- |
| Importance | .47** | .33** | .22** | .18** | .28** |
| Disadvantageousness | .32** | .19** | .16** | .15** | .23** |
| Other responsibility | .15** | .21** | .21** | .15** | .10* |
| Own responsibility | .09 | -.03 | -.05 | .05 | .04 |
| Problem-focused coping | .17** | .17** | .12* | .13** | .12* |
| Emotion-focused coping | -.29** | -.10 | -.13** | -.20** | -.28** |
| Expectedness | .06 | .06 | .13* | .12* | .06 |
| Injustice | .27** | .12* | .17** | .18** | .16** |
| Self-image | .51** | .39** | .37** | .34** | .45** |
| Immorality | .32** | .25** | .21** | .26** | .28** |
| ** *p* < 0.01 * *p* < 0.05 | | | | | |

**Table S5. Correlations between Appraisals and Emotion-regulation Strategies for Episodes of Sadness.**

|  | Rumination | Reflection | Reappraisal | Suppression | Distraction |
| --- | --- | --- | --- | --- | --- |
| Importance | .30** | .16** | .07 | .08 | .09 |
| Disadvantageousness | .34** | .20** | .06 | .12* | .18** |
| Other responsibility | .07 | .11* | .05 | .06 | .00 |
| Own responsibility | .12* | .11* | .19** | .09 | .04 |
| Problem-focused coping | .14** | .13** | .15** | .09 | .02 |
| Emotion-focused coping | -.38** | -.12* | .05 | -.04 | -.11* |
| Expectedness | -.07 | -.01 | .00 | .06 | .14** |
| Injustice | .26** | .08 | -.01 | .11* | .06 |
| Self-image | .32** | .17** | .21** | .19** | .09 |
| Immorality | .15** | .11* | .07 | .05 | .01 |
| ** *p* < 0.01 * *p* < 0.05 | | | | | |

**Table S6. Correlations between Appraisals and Emotion-regulation Strategies for Episodes of Shame.**

|  | Rumination | Reflection | Reappraisal | Suppression | Distraction |
| --- | --- | --- | --- | --- | --- |
| Importance | .53** | .48** | .36** | .25** | .28** |
| Disadvantageousness | .48** | .33** | .26** | .31** | .32** |
| Other responsibility | .12* | .16** | .16** | .08 | .15** |
| Own responsibility | .12* | .11* | -.01 | .11* | .05 |
| Problem-focused coping | .17** | .17** | .09 | .17** | .14** |
| Emotion-focused coping | -.38** | -.29** | -.13* | -.16** | -.11* |
| Expectedness | .12* | .20** | .16** | .14** | .10* |
| Injustice | .25** | .20** | .17** | .23** | .17** |
| Self-image | .56** | .37** | .30** | .37** | .36** |
| Immorality | .30** | .31** | .24** | .22** | .19** |
| ** *p* < 0.01 * *p* < 0.05 | | | | | |
